# Supplementary material for: How Carbon Nanoparticles, Arbuscular Mycorrhiza, and Compost Mitigate Drought Stress in Maize Plant: A Growth and Biochemical Study
Source: MDPI journal article supplement (doi:10.3390/plants11233324), 2022-12-01
Supplement: s1 [file s1]

**Table S1:** Variations in rainfall and relative humidity in the research area on a monthly basis. The information was gathered from the Jeddah meteorological station in Saudi Arabia. Mx stands for maximum temperature, Mn for minimum temperature, and M stands for mean temperature during study period (January to December 2021).

|           | Temperature (C°) |      |      | Relative Humidity (%) | Precipitation (mm) |
|-----------|------------------|------|------|-----------------------|--------------------|
|           | Mx               | Mn   | M    |                       |                    |
| January   | 26.8             | 18.2 | 22.3 | 81                    | 17                 |
| February  | 28               | 19.6 | 23.6 | 87                    | 10                 |
| March     | 30.5             | 20.7 | 25.3 | 95                    | 27                 |
| April     | 32.8             | 23.2 | 27.8 | 83                    | 10                 |
| May       | 35.9             | 26.8 | 31.2 | 84                    | 30                 |
| June      | 37.9             | 27.3 | 32.3 | 86                    | 3                  |
| July      | 38.5             | 29.1 | 33.6 | 93                    | 31                 |
| Augustus  | 38.7             | 30   | 34.2 | 81                    | 1                  |
| September | 38.7             | 30   | 33.9 | 88                    | 11                 |
| October   | 39.2             | 27   | 32.4 | 89                    | 1                  |
| November  | 33.1             | 25.3 | 28.8 | 88                    | 20                 |
| December  | 31.9             | 22.4 | 26.6 | 84                    | 8                  |

**Table S2.** Physicochemical properties of soil used in 2021 growing seasons.  $\pm$  Standard deviation (4 replicates).

| Property                                          | Control         | Composite       | Mycorrhiza      | Com/Myco        |
|---------------------------------------------------|-----------------|-----------------|-----------------|-----------------|
| <b>Particle size distribution (%)</b>             |                 |                 |                 |                 |
| Sand                                              | 77 $\pm$ 3.5    | 75 $\pm$ 3.1    | 74 $\pm$ 3.5    | 74 $\pm$ 4.3    |
| Silt                                              | 6 $\pm$ 0.5     | 7.8 $\pm$ 0.5   | 7.2 $\pm$ 0.7   | 8 $\pm$ 0.5     |
| Clay                                              | 16 $\pm$ 0.8    | 17 $\pm$ 0.8    | 18.5 $\pm$ 0.8  | 18 $\pm$ 0.8    |
| <b>Physical and chemical analysis</b>             |                 |                 |                 |                 |
| pH                                                | 7.61 $\pm$ 0.87 | 7.72 $\pm$ 0.4  | 7.55 $\pm$ 0.54 | 7.25 $\pm$ 0.34 |
| OM %                                              | 1.25 $\pm$ 0.13 | 3.85 $\pm$ 0.13 | 2.15 $\pm$ 0.33 | 4.45 $\pm$ 0.38 |
| EC (ds m <sup>-1</sup> )                          | 0.57 $\pm$ 0.74 | 1.78 $\pm$ 0.7  | 1.68 $\pm$ 0.1  | 2.28 $\pm$ 0.14 |
| <b>Cations (<math>\mu</math>g/gm)</b>             |                 |                 |                 |                 |
| Ca <sup>++</sup>                                  | 1.14 $\pm$ 0.16 | 7.5 $\pm$ 0.83  | 4.54 $\pm$ 0.53 | 9.54 $\pm$ 0.63 |
| Mg <sup>++</sup>                                  | 0.80 $\pm$ 0.2  | 4.54 $\pm$ 0.17 | 2.70 $\pm$ 0.38 | 5.6 $\pm$ 0.41  |
| Na <sup>+</sup>                                   | 1.43 $\pm$ 0.03 | 8.3 $\pm$ 0.9   | 7.6 $\pm$ 0.8   | 7.41 $\pm$ 0.6  |
| K <sup>+</sup>                                    | 3.29 $\pm$ 0.13 | 9.34 $\pm$ 0.5  | 4.25 $\pm$ 0.5  | 11.81 $\pm$ 0.8 |
| <b>Anions (meq L<sup>-1</sup>)</b>                |                 |                 |                 |                 |
| CO <sub>3</sub> <sup>-</sup>                      | 1.10 $\pm$ 0.2  | 11.1 $\pm$ 0.6  | 3.10 $\pm$ 0.1  | 14.5 $\pm$ 0.9  |
| HCO <sub>3</sub> <sup>-</sup>                     | 2.18 $\pm$ 0.16 | 7.18 $\pm$ 0.6  | 3.18 $\pm$ 0.4  | 8.18 $\pm$ 0.1  |
| Cl <sup>-</sup>                                   | 2.6 $\pm$ 0.1   | 12.2 $\pm$ 0.1  | 3.2 $\pm$ 0.6   | 12.6 $\pm$ 0.2  |
| SO <sub>4</sub> <sup>-</sup>                      | 1.55 $\pm$ 0.3  | 6.7 $\pm$ 0.3   | 2.05 $\pm$ 0.6  | 6.51 $\pm$ 0.2  |
| <b>Available nutrients (<math>\mu</math>g/gm)</b> |                 |                 |                 |                 |
| N                                                 | 26.5 $\pm$ 6    | 116.1 $\pm$ 7   | 76.59 $\pm$ 8   | 186.5 $\pm$ 12  |
| P                                                 | 1.81 $\pm$ 0.8  | 16.81 $\pm$ 4   | 6.81 $\pm$ 0.8  | 14.81 $\pm$ 1.2 |
| K                                                 | 79 $\pm$ 27     | 299 $\pm$ 24    | 149.8 $\pm$ 23  | 369 $\pm$ 21    |
| <b>Micro-nutrients (<math>\mu</math>g/gm)</b>     |                 |                 |                 |                 |
| Fe                                                | 1.1 $\pm$ 0.7   | 2.2 $\pm$ 0.7   | 3.21 $\pm$ 4    | 8.94 $\pm$ 1.2  |
| Mn                                                | 2.1 $\pm$ 0.8   | 7.5 $\pm$ 1.1   | 5.54 $\pm$ 1.1  | 11.4 $\pm$ 0.9  |
| Zn                                                | 0.21 $\pm$ 0.0  | 0.55 $\pm$ 0.1  | 0.95 $\pm$ 0.04 | 1.55 $\pm$ 0.1  |
| Cu                                                | 0.4 $\pm$ 0.01  | 1.94 $\pm$ 0.1  | 1.14 $\pm$ 0.1  | 3.94 $\pm$ 0.2  |
